# Supplementary material for: CrOx decoration on Fe/TiO2 with tunable and stable oxygen vacancies for selective oxidation of glycerol to lactic acid
Source: Royal Society of Chemistry journal article supplement (doi:10.1039/d2nj04088c), 2022-01-01
Supplement: d2nj04088c1.pdf [file d2nj04088c1.pdf]

## **Decorated CrO<sub>x</sub> on Fe/TiO<sub>2</sub> with tunable and stable Oxygen Vacancy for Selective Oxidation of Glycerol to Lactic Acid**

Dawang Chu <sup>a, b</sup>, Hui Zhou <sup>c</sup>, Zhicheng Luo\* <sup>a</sup>

<sup>a</sup> MOE Key Laboratory of Energy Thermal Conversion & Control, School of Energy and Environment, Southeast University, Nanjing 210096, China, 202162.

<sup>b</sup> School of Chemistry and Molecular Engineering, East China Normal University, Shanghai, China, 200062.

<sup>c</sup> Key Laboratory for Thermal Science and Power Engineering of Ministry of Education, Beijing Key Laboratory of CO<sub>2</sub> Utilization and Reduction Technology, Department of Energy and Power Engineering, Tsinghua University, Beijing 100084, P.R. China.

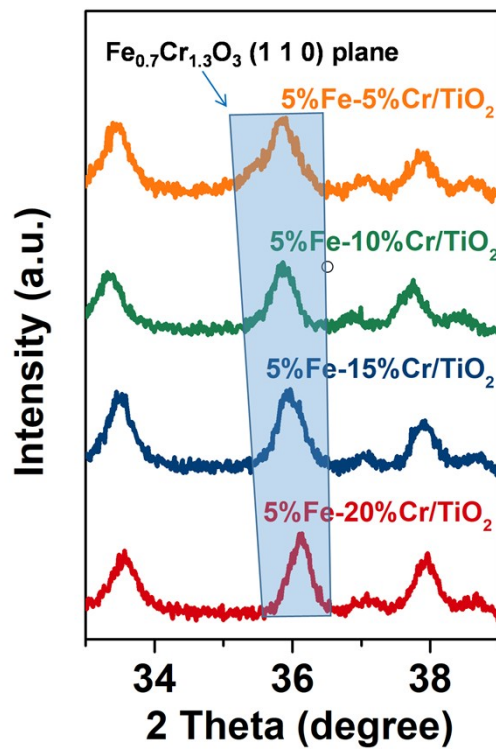

Figure S1. Zoomed area ranging from 33° to 39° in Figure 2a.

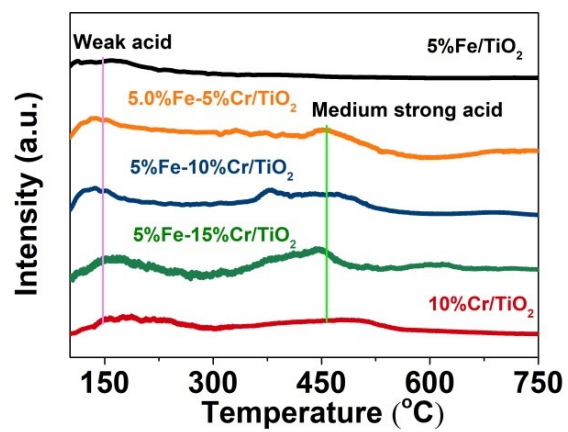

Figure S2. NH<sub>3</sub>-TPD for various Fe-Cr/TiO<sub>2</sub> catalysts.

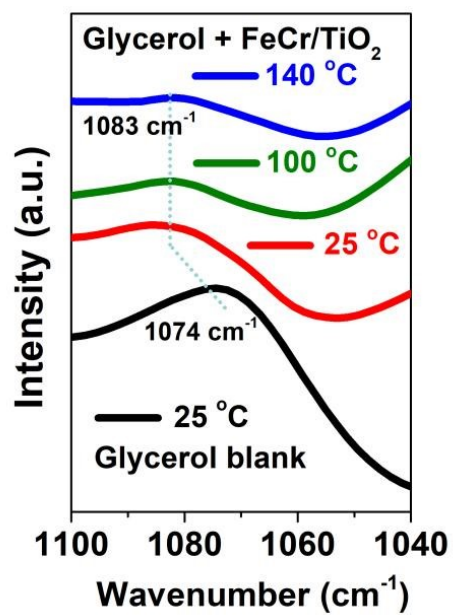

Figure S3. Zoomed area ranging from 1110 cm<sup>-1</sup> to 1040 cm<sup>-1</sup> in Figure 5.

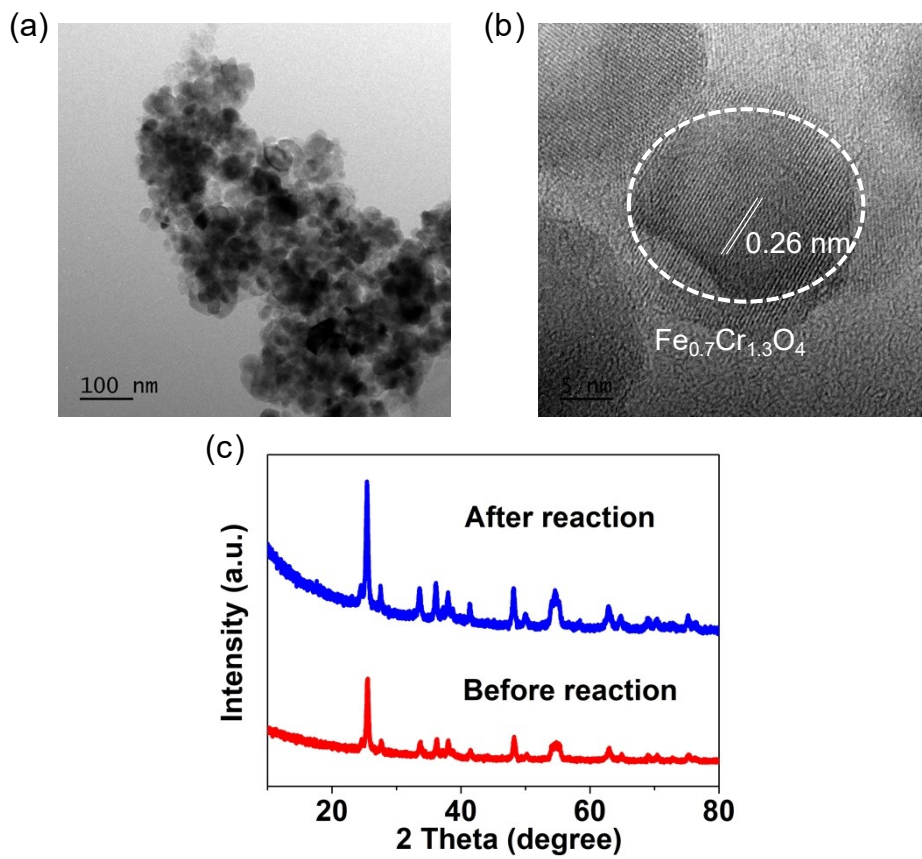

Figure S4. Characterization of the used 5%Fe-10%Cr/TiO<sub>2</sub> catalyst. (a) TEM image, (b) HRTEM image and (c) XRD pattern.

**Table S1.** Effect of catalysts on one-pot conversion of glycerol into LA.

| Catalyst            | Conv. (%) | Selectivity (C%) |                |             |             |        | Carbon balance (C%) |
|---------------------|-----------|------------------|----------------|-------------|-------------|--------|---------------------|
|                     |           | Lactic acid      | Glyceraldehyde | Acetic acid | Formic acid | Others |                     |
| TiO <sub>2</sub>    | 72.1      | 15.1             | 6.5            | 3.1         | 3.3         | 11.5   | 39.5                |
| Fe/TiO <sub>2</sub> | 55.3      | 40.7             | 5.5            | 1.3         | 3.2         | 14.3   | 65.0                |
| Co/TiO <sub>2</sub> | 45.5      | 35.1             | 13.7           | 4.2         | 3.5         | 9.7    | 66.2                |
| Ni/TiO <sub>2</sub> | 55.1      | 23.3             | 37.2           | 5.1         | 3.0         | 8.4    | 77.0                |
| Cu/TiO <sub>2</sub> | 48.4      | 29.4             | 19.0           | 2.5         | 2.2         | 13.6   | 66.7                |
| Zn/TiO <sub>2</sub> | 36.7      | 34.4             | 9.0            | 3.7         | 2.9         | 7.3    | 57.3                |
| Ga/TiO <sub>2</sub> | 46,4      | 30.7             | 11.5           | 4.5         | 3.0         | 9.5    | 59.2                |

Reaction condition: 1.0 g glycerol, 0.2 g catalyst, 0.5 g NaOH, 50 ML H<sub>2</sub>O, 140 °C, 1 Mpa initial pressure of O<sub>2</sub>, 6 h.

**Table S2.** Acidity of 5%Fe-x%Cr/TiO<sub>2</sub> catalysts calculated from NH<sub>3</sub>-TPD.

| Catalysts                   | Total acid amount (μmol/g) <sup>a</sup> |
|-----------------------------|-----------------------------------------|
| 5%Fe/TiO <sub>2</sub>       | 3.0                                     |
| 5%Fe-5%Cr/TiO <sub>2</sub>  | 8.1                                     |
| 5%Fe-10%Cr/TiO <sub>2</sub> | 14.6                                    |
| 5%Fe-15%Cr/TiO <sub>2</sub> | 16.2                                    |
| 10%Cr/TiO <sub>2</sub>      | 12.8                                    |

<sup>a</sup> measured by NH<sub>3</sub>-TPD.

**Table S3.** Acidity of 5%Fe-10%Cr/TiO<sub>2</sub> catalysts reduced at different temperatures calculated from pyridine-adsorbed FT-IR.

| Reduction temperature (°C) | Lewis acid amount (μmol/g) <sup>a</sup> | Brønsted acid amount (μmol/g) <sup>a</sup> |
|----------------------------|-----------------------------------------|--------------------------------------------|
| 300                        | 13.9                                    | 2.5                                        |
| 450                        | 11.2                                    | 1.1                                        |
| 600                        | 6.9                                     | 0.5                                        |
| 750                        | 1.5                                     | 0.1                                        |

<sup>a</sup> measured by Py-FTIR.



**Table S4.** Effect of temperature on one-pot conversion of glycerol into LA over 5%Fe-10%Cr/TiO<sub>2</sub> catalysts..

| Temperature (°C) | Conv. (%) | Selectivity (C%) |                |             |             |        | Carbon balance (C%) |
|------------------|-----------|------------------|----------------|-------------|-------------|--------|---------------------|
|                  |           | Lactic acid      | Glyceraldehyde | Acetic acid | Formic acid | Others |                     |
| 120              | 10.4      | 27.3             | 10.0           | 22.5        | 7.1         | 11.2   | 78.1                |
| 140              | 60.5      | 60.4             | 6.7            | 2.3         | 2.9         | 6.5    | 78.8                |
| 160              | 97.4      | 7.1              | 1.2            | 8.7         | 6.6         | 9.7    | 33.3                |
| 180              | 99.2      | 7.8              | 0.6            | 10.4        | 17.4        | 8.4    | 44.6                |

Reaction condition: 1.0 g glycerol, 0.2 g catalyst, 0.5 g NaOH, 50 ML H<sub>2</sub>O, 1 Mpa initial pressure of O<sub>2</sub>, 6 h.
